# Supplementary material for: Association between Timing of Energy Intake and Insulin Sensitivity: A Cross-Sectional Study
Source: Nutrients. 2020 Feb 16;12(2):503. doi: 10.3390/nu12020503 (PMC7071301; doi:10.3390/nu12020503)
Supplement: Supplementary file 1 [file nutrients-12-00503-s001.pdf]

Supplemental Material for Rangaraj *et al*, Association between timing of energy intake and insulin sensitivity: a cross-sectional study

Supplemental Table S1: Associations between insulin sensitivity estimated using the Matsuda Index calculated with 300 minutes and dietary proportion variables using linear regression models (n=40).

| Dependent Variable          | Independent Variable                     | Unadjusted Model       |         | Adjusted Model *       |         |
|-----------------------------|------------------------------------------|------------------------|---------|------------------------|---------|
|                             |                                          | B-coefficient (95% CI) | P-value | B-coefficient (95% CI) | P-value |
| Proportions                 |                                          |                        |         |                        |         |
| Matsuda Index – 300 minutes | Proportion of morning calories (per 10%) | 4.1 (0.7 to 7.5)       | 0.020   | 3.7 (0.3 to 7.1)       | 0.03    |
|                             | Proportion of evening calories (per 10%) | -2.4 (-5.8 to 0.9)     | 0.15    | -3.1 (-6.5 to 0.3)     | 0.07    |
| Timing                      |                                          |                        |         |                        |         |
| Matsuda Index – 300 minutes | 25% total calorie intake (per hour)      | -2.2 (-4.0 to -0.3)    | 0.023   | -2.2 (-4.1 to -0.4)    | 0.02    |
|                             | 50% total calorie intake (per hour)      | -1.5 (-3.3 to 0.4)     | 0.12    | -1.7 (-3.4 to 0.1)     | 0.07    |
|                             | 75% total calorie intake (per hour)      | -0.4 (-3.0 to 2.3)     | 0.79    | -1.3 (-4.0 to 1.4)     | 0.33    |

\* The models were adjusted for age, sex, BMI, race, total daily energy intake and sleep timing.

Supplemental Table S2: Associations between insulin sensitivity and dietary proportion variables using linear regression models in those whose habitual wake time is earlier than start of OGTT (n=39).

| Dependent Variable | Independent Variable                     | Unadjusted Model             |         | Adjusted Model *             |         |
|--------------------|------------------------------------------|------------------------------|---------|------------------------------|---------|
|                    |                                          | B-coefficient<br>(95% CI)    | P-value | B-coefficient<br>(95% CI)    | P-value |
| Proportions        |                                          |                              |         |                              |         |
| Matsuda Index      | Proportion of morning calories (per 10%) | 3.3<br>(0.5 to 6.2)          | 0.021   | 2.1<br>(-0.8 to 5.0)         | 0.15    |
|                    | Proportion of evening calories (per 10%) | -1.9<br>(-4.8 to 1.1)        | 0.21    | -1.2<br>(-4.1 to 1.7)        | 0.40    |
| QUICKI             | Proportion of morning calories (per 10%) | 0.008<br>(.001 to 0.015)     | 0.02    | 0.005<br>(-0.002 to 0.012)   | 0.15    |
|                    | Proportion of evening calories (per 10%) | -0.003<br>(-0.01 to 0.005)   | 0.46    | -.002<br>(-0.009 to 0.005)   | 0.61    |
| Timing             |                                          |                              |         |                              |         |
| Matsuda Index      | 25% total calorie intake (per hour)      | -1.9<br>(-3.5 to -0.3)       | 0.025   | -1.0<br>(-2.7 to 0.7)        | 0.24    |
|                    | 50% total calorie intake (per hour)      | -0.9<br>(-2.4 to 0.6)        | 0.23    | -0.7<br>(-2.1 to 0.7)        | 0.35    |
|                    | 75% total calorie intake (per hour)      | -0.2<br>(-2.3 to 1.9)        | 0.85    | -0.6<br>(-2.6 to 1.5)        | 0.56    |
| QUICKI             | 25% total calorie intake (per hour)      | -0.005<br>(-0.009 to -0.001) | 0.01    | -0.004<br>(-0.008 to 0.0004) | 0.07    |
|                    | 50% total calorie intake (per hour)      | -0.002<br>(-0.006 to 0.001)  | 0.18    | -0.002<br>(-0.005 to 0.002)  | 0.28    |
|                    | 75% total calorie intake (per hour)      | -0.001<br>(-.006 to .004)    | 0.74    | -0.001<br>(-0.007, 0.004)    | 0.60    |

\* The models were adjusted for age, sex, BMI, race, total daily energy intake and sleep timing.
